# Supplementary material for: Prevalence of HIV among MSM in Europe: comparison of self-reported diagnoses from a large scale internet survey and existing national estimates
Source: PubMed Central journal article supplement (PMC3526585; doi:10.1186/1471-2458-12-978), 2012-11-14
Supplement: 1471-2458-12-978-S1.pdf [file 1471-2458-12-978-S1.pdf]

**Additional Table: Country data on EMIS sample size, number ever tested for HIV, self-reported HIV prevalence, and proportion with reported UAI risk in the previous 12 months among those who have never tested for HIV. Sorting by increasing probability of underestimating prevalence in the EMIS sample by self-reported prevalence (based on proportion ever testing among respondents with UAI-risk in previous 12 months)**

|               |                | Sample size<br>(N) | Ever tested<br>for HIV | proportion<br>ever tested | Diagnosed<br>HIV+ (N) | Diagnosed<br>HIV+ among<br>tested (%) | UAI reported<br>in previous<br>12 months<br>among<br>respondents<br>not tested in<br>previous 12<br>months* | UAI reported<br>in previous<br>12 months<br>among<br>respondents<br>never<br>tested** |
|---------------|----------------|--------------------|------------------------|---------------------------|-----------------------|---------------------------------------|-------------------------------------------------------------------------------------------------------------|---------------------------------------------------------------------------------------|
| fr            | France         | 11,197             | 9,299                  | 83.0%                     | 1,180                 | 12.7%                                 | 54.5%                                                                                                       | 28.7%                                                                                 |
| ch            | Switzerland    | 5,045              | 3,979                  | 78.9%                     | 456                   | 11.5%                                 | 60.9%                                                                                                       | 30.5%                                                                                 |
| be            | Belgium        | 4,000              | 3,210                  | 80.3%                     | 338                   | 10.5%                                 | 57.5%                                                                                                       | 31.8%                                                                                 |
| dk            | Denmark        | 1,749              | 1,286                  | 73.5%                     | 154                   | 12.0%                                 | 63.4%                                                                                                       | 32.3%                                                                                 |
| nl            | Netherlands    | 3,810              | 2,997                  | 78.7%                     | 595                   | 19.9%                                 | 63.1%                                                                                                       | 34.6%                                                                                 |
| se            | Sweden         | 3,149              | 2,343                  | 74.4%                     | 151                   | 6.4%                                  | 66.5%                                                                                                       | 35.1%                                                                                 |
| lu            | Luxemburg      | 279                | 218                    | 78.1%                     | 30                    | 13.8%                                 | 57.8%                                                                                                       | 37.8%                                                                                 |
| es            | Spain          | 13,136             | 9,612                  | 73.2%                     | 1,170                 | 12.2%                                 | 61.0%                                                                                                       | 38.2%                                                                                 |
| uk            | United Kingdom | 17,739             | 12,647                 | 71.3%                     | 1,847                 | 14.6%                                 | 64.6%                                                                                                       | 38.9%                                                                                 |
| at            | Austria        | 4,112              | 3,054                  | 74.3%                     | 221                   | 7.2%                                  | 69.4%                                                                                                       | 43.5%                                                                                 |
| it            | Italy          | 15,915             | 11,275                 | 70.8%                     | 1,096                 | 9.7%                                  | 66.8%                                                                                                       | 44.7%                                                                                 |
| ru            | Russia         | 5,055              | 3,723                  | 73.6%                     | 321                   | 8.6%                                  | 67.0%                                                                                                       | 44.7%                                                                                 |
| pt            | Portugal       | 5,193              | 3,723                  | 71.7%                     | 405                   | 10.9%                                 | 64.8%                                                                                                       | 44.8%                                                                                 |
| bg            | Bulgaria       | 1,045              | 650                    | 62.2%                     | 16                    | 2.5%                                  | 63.9%                                                                                                       | 46.1%                                                                                 |
| no            | Norway         | 2,100              | 1,373                  | 65.4%                     | 72                    | 5.2%                                  | 71.1%                                                                                                       | 46.2%                                                                                 |
| cy            | Cyprus         | 267                | 156                    | 58.4%                     | 3                     | 1.9%                                  | 74.7%                                                                                                       | 47.0%                                                                                 |
| de            | Germany        | 54,774             | 37,764                 | 68.9%                     | 4,379                 | 11.6%                                 | 73.0%                                                                                                       | 48.0%                                                                                 |
| ie            | Ireland        | 2,196              | 1,379                  | 62.8%                     | 131                   | 9.5%                                  | 72.5%                                                                                                       | 48.2%                                                                                 |
| mt            | Malta          | 116                | 80                     | 69.0%                     | 2                     | 2.5%                                  | 71.4%                                                                                                       | 48.6%                                                                                 |
| ee            | Estonia        | 590                | 355                    | 60.2%                     | 10                    | 2.8%                                  | 75.6%                                                                                                       | 52.4%                                                                                 |
| gr            | Greece         | 2,964              | 1,857                  | 62.7%                     | 239                   | 12.9%                                 | 77.0%                                                                                                       | 53.5%                                                                                 |
| fi            | Finland        | 2,028              | 1,265                  | 62.4%                     | 65                    | 5.1%                                  | 78.8%                                                                                                       | 54.1%                                                                                 |
| by            | Belarus        | 368                | 230                    | 62.5%                     | 7                     | 3.0%                                  | 78.0%                                                                                                       | 55.9%                                                                                 |
| tk            | Turkey         | 1,813              | 895                    | 49.4%                     | 27                    | 3.0%                                  | 76.0%                                                                                                       | 57.6%                                                                                 |
| hu            | Hungary        | 2,069              | 1,189                  | 57.5%                     | 66                    | 5.6%                                  | 74.1%                                                                                                       | 57.7%                                                                                 |
| pl            | Poland         | 2,776              | 1,709                  | 61.6%                     | 141                   | 8.3%                                  | 78.4%                                                                                                       | 58.3%                                                                                 |
| mk            | Macedonia      | 118                | 65                     | 55.1%                     | 5                     | 7.7%                                  | 72.4%                                                                                                       | 58.6%                                                                                 |
| ua            | Ukraine        | 1,719              | 1,009                  | 58.7%                     | 83                    | 8.2%                                  | 76.2%                                                                                                       | 61.4%                                                                                 |
| si            | Slovenia       | 982                | 507                    | 51.6%                     | 26                    | 5.1%                                  | 80.2%                                                                                                       | 61.5%                                                                                 |
| md            | Moldova        | 117                | 69                     | 59.0%                     | 3                     | 4.3%                                  | 81.1%                                                                                                       | 62.2%                                                                                 |
| lv            | Latvia         | 701                | 347                    | 49.5%                     | 27                    | 7.8%                                  | 81.1%                                                                                                       | 63.5%                                                                                 |
| ro            | Romania        | 2,338              | 1,168                  | 50.0%                     | 60                    | 5.1%                                  | 78.5%                                                                                                       | 64.3%                                                                                 |
| rs            | Serbia         | 1,108              | 577                    | 52.1%                     | 31                    | 5.4%                                  | 80.9%                                                                                                       | 65.6%                                                                                 |
| cz            | Czech          | 2,437              | 1,339                  | 54.9%                     | 66                    | 4.9%                                  | 82.8%                                                                                                       | 68.1%                                                                                 |
| hr            | Croatia        | 523                | 270                    | 51.6%                     | 13                    | 4.8%                                  | 86.3%                                                                                                       | 68.1%                                                                                 |
| lt            | Lithuania      | 591                | 251                    | 42.5%                     | 12                    | 4.8%                                  | 87.8%                                                                                                       | 69.3%                                                                                 |
| sk            | Slovakia       | 590                | 274                    | 46.4%                     | 6                     | 2.2%                                  | 84.5%                                                                                                       | 70.6%                                                                                 |
| ba            | Bosnia         | 150                | 65                     | 43.3%                     | 0                     | 0.0%                                  | 85.7%                                                                                                       | 73.8%                                                                                 |
| <b>Min</b>    |                |                    |                        | <b>42.5%</b>              |                       | <b>0.0%</b>                           | <b>54.5%</b>                                                                                                | <b>28.7%</b>                                                                          |
| <b>Median</b> |                |                    |                        | <b>63.1%</b>              |                       | <b>7.5%</b>                           | <b>72.6%</b>                                                                                                | <b>51.2%</b>                                                                          |
| <b>Max</b>    |                |                    |                        | <b>83.0%</b>              |                       | <b>19.9%</b>                          | <b>87.8%</b>                                                                                                | <b>73.8%</b>                                                                          |

\*proportion of EMIS respondents not yet diagnosed with HIV who reported UAI with any partner of unknown or discordant HIV status in the previous 12 months who have not been tested for HIV in the previous 12 months

\*\*proportion of EMIS respondents not yet diagnosed with HIV who reported UAI with any partner of unknown or discordant HIV status in the previous 12 months who have never been tested for HIV
